# Supplementary material
Source: Springer Nature journal article supplement (https://www.springermedizin.de/resource/supplementary/13048_2011_91_MOESM2_ESM.pdf/9664878)
Supplement: MOESM2 [file 9664878]

Tubal Ligation Literature search (N=179)

Databases: PubMed, Embase, Web of Science

Limits: English

Search terms: “tubal sterilization” and “ovarian cancer”; “tubal ligation” and “ovarian cancer”

Reference search and reverse citation (N=3)

Database: Web of Science (Cited Reference Search)

Hysterectomy literature search (N=4)

Hysterectomy Literature search (N=5,727)

Databases: PubMed (N=2,051), Embase (N=2,698), Web of Science (N=978)

Limits: Human, Female, Cancer, English

Search terms: “hysterectomy” and “ovarian cancer”

Reference search and reverse citation (N=18)

Database: Web of Science (Cited Reference Search)

Tubal ligation literature search (N=5)

Personal communication with NECC researchers (N=1)

Tubal ligation study selection  
Search results combined (N=187)

Hysterectomy study selection  
Search results combined (N=5,751)

Title and abstract screened

Title and abstract screened

Excluded (n=143)

Did not present original data on tubal sterilization and ovarian cancer (review articles, sterilization was a stratification variable, etc.)

Included (N=44)

Excluded (n=5,666)

Did not present original data on hysterectomy and ovarian cancer (review articles, hysterectomy was a stratification variable, etc.)

Included (N=85)

Manuscript review

Manuscript review

Excluded (N=14)

Participants overlapped with included study/ later publication available: 13  
Tubal sterilization and hysterectomy combined exposure: 1

Included (N=30)

Excluded (N=61)

Participants overlapped with included study/ later publication available: 39  
Case only data available: 12  
Poorly defined exposure: 10

Included (N=24)
